# Supplementary figures and images for: DZ-2384 has a superior preclinical profile to taxanes for the treatment of triple-negative breast cancer and is synergistic with anti-CTLA-4 immunotherapy
Source: PubMed Central journal article supplement — Anticancer Drugs. 2018 Aug 17;29(8):774–85. doi: 10.1097/CAD.0000000000000653 (PMC6133219; doi:10.1097/cad.0000000000000653), 2018-08-17

Supplementary Figure 1.

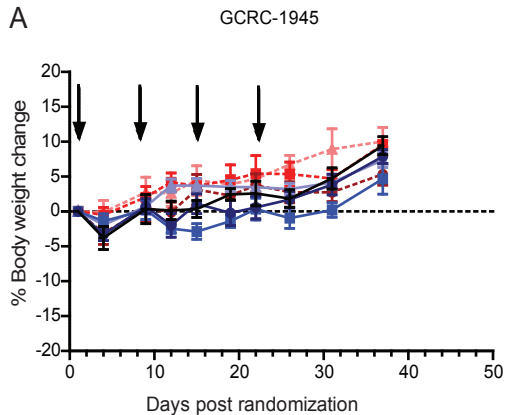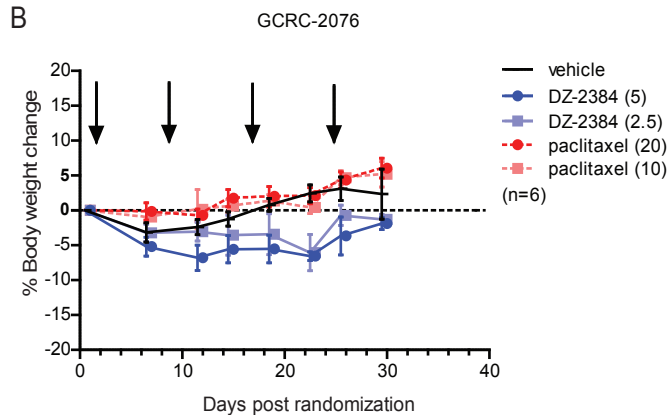

Supplement: cad-29-774-s001.pdf [file cad-29-774-s001.pdf]
